# Supplementary material
Source: PubMed Central journal article supplement (PMC6150941)
Supplement: Supp_Fig1.pdf [file Supp_Fig1.pdf]

## Supplementary Data

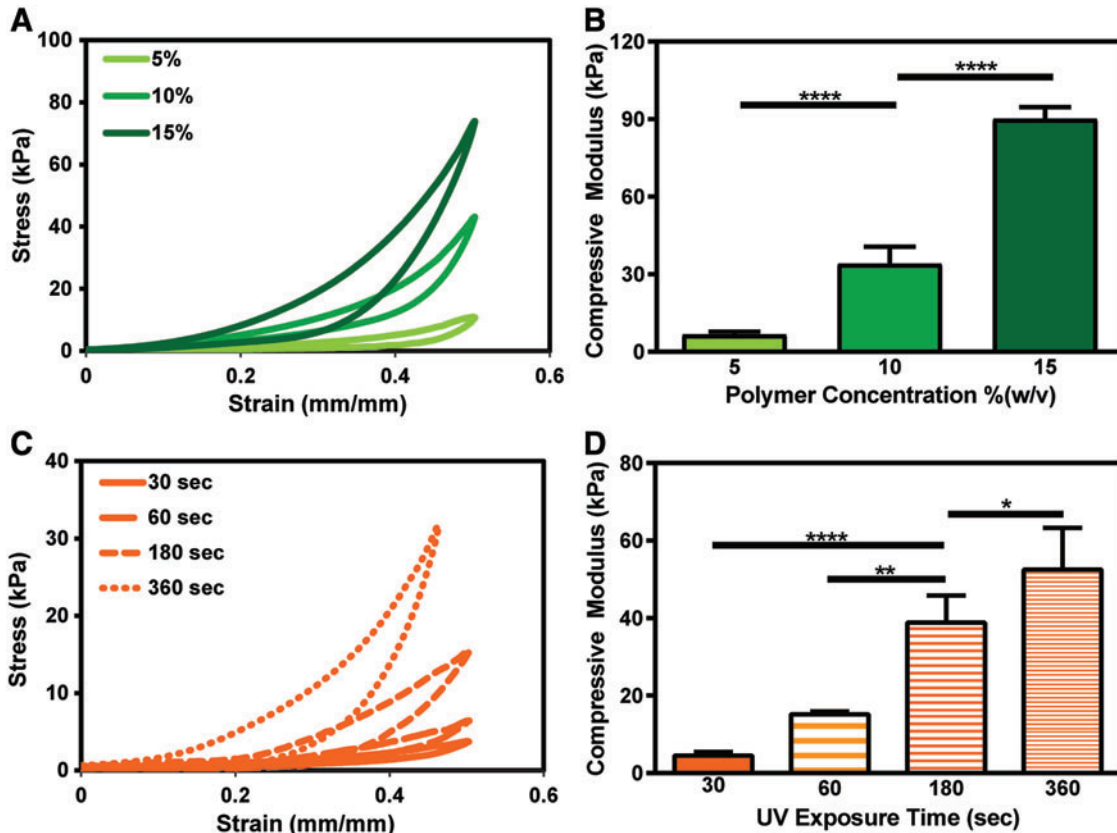

**SUPPLEMENTARY FIG. S1.** Mechanical characterization of 50/50 GelMA/MeTro composite hydrogels produced with varying polymer concentrations. (A) Representative compressive stress–strain curves and (B) compressive modulus for 50/50 GelMA/MeTro composite hydrogels produced with varying total polymer concentration and 180 s crosslinking time. (C) Representative compressive stress–strain curves and (D) compressive modulus for 50/50 GelMA/MeTro composite hydrogels at 10% (w/v) total polymer concentration produced at varying crosslinking times. (\* $p < 0.05$ , \*\* $p < 0.01$ , \*\*\* $p < 0.0001$ ). GelMA, gelatin-methacryloyl; MeTro, methacryloyl-substituted tropoelastin.
