# Supplementary material
Source: PubMed Central journal article supplement (PMC6150941)
Supplement: Supp_Fig2.pdf [file Supp_Fig2.pdf]

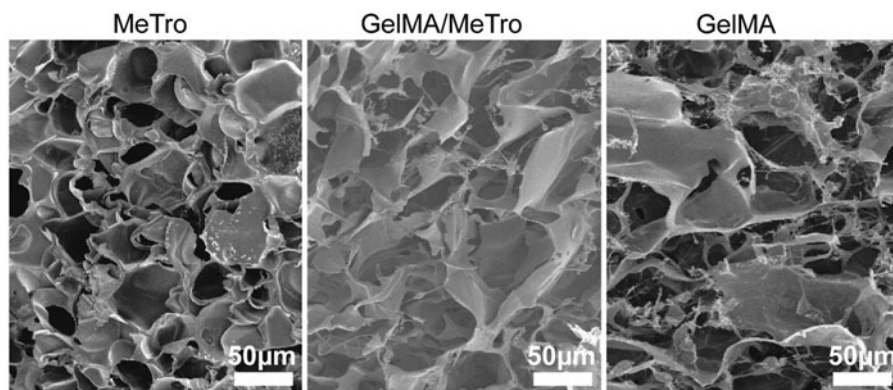

**SUPPLEMENTARY FIG. S2.** Structural characterization of GelMA/MeTro composite hydrogels. Representative scanning electron microscopy images from the cross-sections of MeTro, 50/50 GelMA/MeTro, and GelMA hydrogels produced using 10% (w/v) total polymer concentration and 180 s crosslinking.
