# Supplementary material
Source: PubMed Central journal article supplement (PMC6150941)
Supplement: Supp_Fig3.pdf [file Supp_Fig3.pdf]

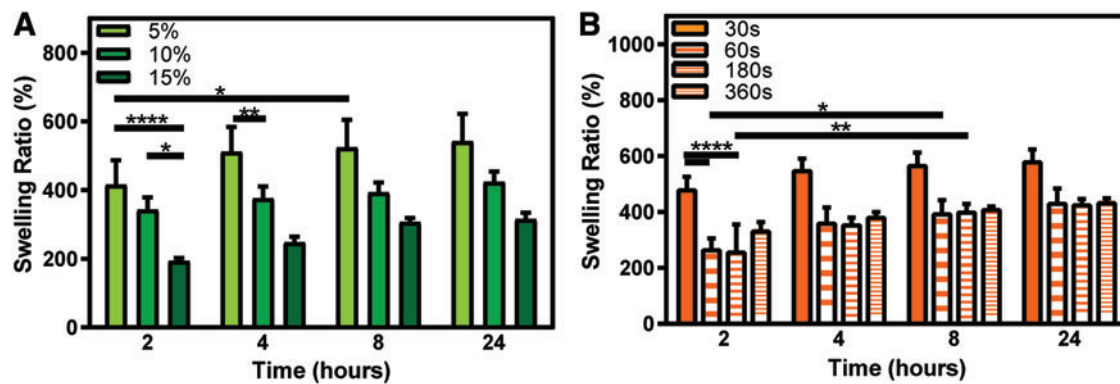

**SUPPLEMENTARY FIG. S3.** Swelling ratios of GelMA/MeTro composite hydrogels. (A) Swelling ratio after 2, 4, 8, and 24 h for 50/50 GelMA/MeTro composite hydrogels produced with varying total polymer concentration and 180 s crosslinking time. (B) Swelling ratio after 2, 4, 8, and 24 h for 50/50 (w/w) GelMA/MeTro composite hydrogels at 10% (w/v) total polymer concentration produced with various crosslinking times (\* $p < 0.05$ , \*\* $p < 0.01$ , \*\*\*\* $p < 0.0001$ ).
